# Supplementary material
Source: Elsevier journal article supplement (https://www.sciencedirect.com/science/article/pii/S0213911115000680)
Supplement: mmc1 [file S0213911115000680:mmc1.docx]

**Tabla I**

Características de los episodios de urgencias por lesiones por tráfico atendidos en hospitales o dispositivos de urgencias de atención primaria de alta resolución según la gravedad de las lesiones. Catalunya, 2013

|  | Leves | Moderadas | Graves | Desconocido | Total | p |
| --- | --- | --- | --- | --- | --- | --- |
|  |  |  |  |  |  |  |
|  |  |  |  |  |  |  |
| *Episodios (N)*  *Tasa episodios (por 100.000 hab)* | 32.483 | 6.133 | 1.833 | 18.823 | 59.272 |  |
| 429,2 | 81,0 | 24,2 | 248,7 | 783,1 |  |
| *Sexo (%)*a |  |  |  |  |  |  |
| Hombres | 54,9 | 68,1 | 75,1 | 52,7 | 56,2 | <0,0001 |
| Mujeres | 45,1 | 31,9 | 24,9 | 47,3 | 43,8 |  |
| *Grupo de edad (%)*a |  |  |  |  |  |  |
| <18 años | 8,4 | 10,2 | 8,2 | 9,1 | 8,8 | <0,0001 |
| 18-34 años | 45,4 | 28,8 | 25,2 | 46,1 | 43,3 |  |
| 35-64 años | 40,3 | 47,7 | 48,0 | 39,7 | 41,1 |  |
| >64 años | 5,9 | 13,3 | 18,7 | 5,1 | 6,8 |  |
| *Edad (media ± DE)* | 35,6 ± 16,0 | 41,3 ± 19,1 | 44,6 ± 20,6 | 36,7 ± 16,4 | 36,2 ± 16,9 | <0,0001 |
| *Estancias (media ± DE)* | 0,2 ± 0,8 | 2,8 ± 7,3 | 12,6 ± 19,9 | 0,2 ± 1,7 | 0,8 ± 4,6 | <0,0001 |
| *Estancias (mediana)* | 0 | 0 | 7 | 0 | 0 |  |
| *Complejidad (media ± DE)* |  |  |  |  |  |  |
| *Peso GRD-APR* | 0,589 ± 0,17 | 0,905 ± 0,77 | 2,205 ± 2,64 | 0,918 ± 1,06 | 1,312 ± 1,78 | <0,0001 |
| *Mortalidad hospitalaria (%)* | 0,0 | 0,1 | 4,7 | 0,0 | 0,2 | <0,0001 |
| *Tipo de lesión (%)*b |  |  |  |  |  |  |
| Fractura | 1,5 | 72,7 | 85,1 | 0,6 | 11,2 | <0,0001 |
| Dislocación | 0,2 | 6,8 | 3,7 | 0,1 | 1,0 | <0,0001 |
| Esguince | 50,0 | 7,9 | 3,7 | 1,1 | 28,7 | <0,0001 |
| Interna | 0,5 | 20,8 | 51,0 | 0,1 | 4,0 | <0,0001 |
| Herida | 3,8 | 7,8 | 12,5 | 0,2 | 3,4 | <0,0001 |
| Contusión | 49,1 | 21,0 | 16,8 | 1,9 | 30,2 | <0,0001 |
| Otras lesiones | 0,1 | 1,1 | 4,7 | 0,4 | 0,4 | <0,0001 |
| Inespecífica | 2,7 | 2,7 | 7,0 | 0,1 | 2,0 | <0,0001 |
| No clasificada | 0,0 | 0,6 | 2,0 | 95,6 | 30,5 | <0,0001 |
| *Número de lesiones* |  |  |  |  |  |  |
| Ninguna | 0,0 | 0,6 | 2,0 | 95,6 | 30,5 | <0,0001 |
| Una | 92,3 | 66,8 | 39,0 | 4,3 | 60,1 |  |
| Dos | 7,4 | 24,8 | 37,3 | 0,1 | 7,8 |  |
| Tres o más | 0,3 | 7,8 | 21,8 | 0,0 | 1,6 |  |

DE: desviación estándar; GRD-APR: *All Patients Refined Diagnosis Related Groups*.

aEn ocho casos no se dispone de información sobre edad y sexo.

bVariables independientes según la matriz de Barell, y en cualquier diagnóstico, no sólo en el principal.
